# Supplementary material for: Physical stimulus and chemical modulations of bistable molecular magnetic materials
Source: Royal Society of Chemistry journal article supplement (doi:10.1039/d0cc04202a), 2020-01-01
Supplement: d0cc04202a1.pdf [file d0cc04202a1.pdf]

## Supporting Information

# Physical Stimuli and Chemical Modulations for Bistable Molecular Magnetic Materials

Min Feng,<sup>a†</sup> Ze-Yu Ruan,<sup>a†</sup> Yan-Cong Chen<sup>\*a</sup> and Ming-Liang Tong<sup>\*a</sup>

<sup>a</sup> *Key Laboratory of Bioinorganic and Synthetic Chemistry of Ministry of Education, School of Chemistry, Sun Yat-Sen University, Guangzhou 510275, P. R. China.  
E-mail: chenyc26@mail.sysu.edu.cn (Y.-C. Chen), tongml@mail.sysu.edu.cn (M.-L. Tong)*

<sup>†</sup> *These authors contributed equally to this work.*

|                                                                       |    |
|-----------------------------------------------------------------------|----|
| 1. Hysteresis Loop Measurement Information of the aforementioned SMMs | S2 |
| 2. Synthesis and characterization                                     | S4 |
| 3. References                                                         | S5 |

## 1. Hysteresis Loop Measurement information of the aforementioned SMMs

Table S1 Hysteresis Loop Measurement information of the aforementioned SMMs.

| Name <sup>b</sup>                                                                                                     | Hysteresis $T_{hy}$ [K] | Sweep Rate [mT s <sup>-1</sup> ]   | Reference |
|-----------------------------------------------------------------------------------------------------------------------|-------------------------|------------------------------------|-----------|
| [Zn <sub>2</sub> Dy(TTTT <sup>Br</sup> ) <sub>2</sub> (MeOH)] <sup>+</sup>                                            | 11                      | 20                                 | 1         |
| [Zn <sub>2</sub> Dy(TTTT <sup>Cl</sup> ) <sub>2</sub> (Me <sub>2</sub> CO)](NO <sub>3</sub> )                         | 14                      | 20                                 | 2         |
| [Zn <sub>2</sub> Dy(TTTT <sup>Cl</sup> ) <sub>2</sub> (MeOH)](CF <sub>3</sub> SO <sub>3</sub> )                       | 12                      | 20                                 | 2         |
| [Zn <sub>2</sub> Dy(TTTT <sup>Cl</sup> ) <sub>2</sub> (Me <sub>2</sub> CO)](BPh <sub>4</sub> )                        | 23                      | 20                                 | 2         |
| [Zn <sub>2</sub> Dy(TTTT <sup>Cl</sup> ) <sub>2</sub> (DMF)](BPh <sub>4</sub> )                                       | 22                      | 20                                 | 2         |
| [Zn <sub>2</sub> Dy(TTTT <sup>Cl</sup> ) <sub>2</sub> (NMP)](BPh <sub>4</sub> )                                       | 24                      | 20                                 | 2         |
| [Dy(Cy <sub>3</sub> PO) <sub>2</sub> (H <sub>2</sub> O) <sub>5</sub> ]Cl <sub>3</sub>                                 | 11                      | 20                                 | 3         |
| [Dy(Cy <sub>3</sub> PO) <sub>2</sub> (H <sub>2</sub> O) <sub>5</sub> ]Br <sub>3</sub>                                 | 20                      | 20                                 | 3         |
| [Dy( <sup>t</sup> BuPO(NH <sup>t</sup> Pr) <sub>2</sub> (H <sub>2</sub> O) <sub>5</sub> ][I <sub>3</sub> ]            | 12                      | 1.8                                | 4         |
| [Dy(HMPA) <sub>2</sub> (H <sub>2</sub> O) <sub>5</sub> ]Cl <sub>3</sub>                                               | 9 (diluted sample)      | 4                                  | 5         |
| [Dy(HMPA) <sub>2</sub> (H <sub>2</sub> O) <sub>5</sub> ]I <sub>3</sub>                                                | 9 (diluted sample)      | 4                                  | 5         |
| [Dy(Cy <sub>3</sub> PO) <sub>2</sub> (H <sub>2</sub> O) <sub>5</sub> ](CF <sub>3</sub> SO <sub>3</sub> ) <sub>3</sub> | 2 (butterfly shaped)    | 1.8                                | 6         |
| [Dy(O <sup>t</sup> Bu) <sub>2</sub> (py) <sub>5</sub> ] <sup>+</sup>                                                  | 8.8 (butterfly shaped)  | 1.2                                | 7         |
| [Dy(L <sup>a</sup> ) <sub>2</sub> (py) <sub>5</sub> ] <sup>+</sup>                                                    | 22                      | 1                                  | 8         |
| [Dy(bbpen)Cl]                                                                                                         | 8                       | 20                                 | 9         |
| [Dy(bbpen)Br]                                                                                                         | 14                      | 20                                 | 9         |
| [Dy(bbpen-CH <sub>3</sub> )Cl]                                                                                        | 6                       | 20                                 | 10        |
| [Dy(bbpen-CH <sub>3</sub> )Br]                                                                                        | 15                      | 20                                 | 10        |
| [Dy(bbpen)(tpo) <sub>2</sub> ] <sup>+</sup>                                                                           | 6                       | 20                                 | 11        |
| [Dy <sub>2</sub> (bbpen) <sub>2</sub> {Fe(CN) <sub>6</sub> }] <sup>-</sup>                                            | 2 (butterfly shaped)    | 20                                 | 12        |
| [Dy <sub>2</sub> (bbpen) <sub>2</sub> {Co(CN) <sub>6</sub> }] <sup>-</sup>                                            | 15                      | 20                                 | 12        |
| [(Cp <sup>†††</sup> ) <sub>2</sub> Dy] <sup>+</sup>                                                                   | 60                      | 3.9 (Ref. 13);<br>2.2(9) (Ref. 14) | 13, 14    |

|                                                     |    |     |    |
|-----------------------------------------------------|----|-----|----|
| $[(\text{Cp}^{\text{ipr4}})_2\text{Dy}]^+$          | 32 | 3.1 | 15 |
| $[(\text{Cp}^{\text{ipr4Me}})_2\text{Dy}]^+$        | 72 | 3.1 | 15 |
| $[(\text{Cp}^{\text{ipr4Et}})_2\text{Dy}]^+$        | 66 | 3.1 | 15 |
| $[(\text{Cp}^{\text{ipr5}})_2\text{Dy}]^+$          | 66 | 3.1 | 15 |
| $[(\text{Cp}^{\text{ipr5}})\text{Dy}(\text{Cp}^*)]$ | 80 | 2.5 | 16 |

Abbreviations:  $\text{H}_3\text{TTTT}^{\text{Br}} = 2,2',2''\text{-}(((\text{nitriлотris}(\text{ethane-2,1-diyl}))\text{tris}(\text{azanediy}))\text{tris}(\text{methylene}))\text{tris-}(4\text{-bromophenol})$ ;  $\text{H}_3\text{TTTT}^{\text{Cl}} = 2,2',2''\text{-}(((\text{nitriлотris}(\text{ethane-2,1-diyl}))\text{tris}(\text{azanediy}))\text{tris}(\text{methylene}))\text{tris}(4\text{-chlorophenol})$ ; DMF = N,N-Dimethylformamide; NMP = 1-Methyl-2-pyrrolidinone;  $\text{Cy}_3\text{PO}$  = tricyclohexylphosphine oxide; HMPA = hexamethylphosphoramide;  $\text{HL}^a = (\text{S})\text{-}(-)\text{-}1\text{-phenylethanol}$ ;  $\text{H}_2\text{bbpen} = \text{N,N}'\text{-bis}(2\text{-hydroxybenzyl})\text{-N,N}'\text{-bis}(2\text{-methylpyridyl})\text{ethylenediamine}$ ; tpo = triphenyl phosphine oxide;  $\text{Cp}^{\text{ttt}} = 1,2,4\text{-tri}(\text{tertbutyl})\text{cyclopentadienide}$ ;  $\text{Cp}^{\text{ipr5}} = \text{pentaisopropylcyclopentadienyl}$ ;  $\text{Cp}^* = \text{pentamethylcyclopentadienyl}$ . <sup>b</sup> Lattice solvent/uncoordinated molecules and counterions are not listed whenever it would not cause misunderstanding.

## 2. Spin transition temperatures (K), hysteresis widths $\Delta T$ (K) for selected SCO materials

**Table S2** Spin transition temperatures (K), hysteresis widths  $\Delta T$  (K) for selected SCO materials.

| Name                                                                                                 | $T_{1/2\downarrow}$ [K] | $T_{1/2\uparrow}$ [K] | $\Delta T$ [K] | Reference |
|------------------------------------------------------------------------------------------------------|-------------------------|-----------------------|----------------|-----------|
| [Fe <sup>II</sup> (MebptH) <sub>2</sub> (AgCN) <sub>2</sub> ]                                        | 232                     | 235                   | 3              | 17        |
| [Fe <sup>II</sup> (bpztH) <sub>2</sub> (AgCN) <sub>2</sub> ]                                         | 286                     | 292                   | 6              | 17        |
| [Fe(3-NH <sub>2</sub> py) <sub>2</sub> Ni(CN) <sub>4</sub> ]                                         | 148                     | 173                   | 25             | 18        |
| [Fe(3-NH <sub>2</sub> py) <sub>2</sub> Pd(CN) <sub>4</sub> ]                                         | 169                     | 206                   | 37             | 18        |
| [Fe(3-NH <sub>2</sub> py) <sub>2</sub> Pt(CN) <sub>4</sub> ]                                         | 183                     | 213                   | 30             | 18        |
| {Fe(3-Fpy) <sub>2</sub> [Ni(CN) <sub>4</sub> ]}                                                      | 206.5                   | 233.0                 | 26.5           | 19        |
| {Fe(3-Fpy) <sub>2</sub> [Pd(CN) <sub>4</sub> ]}                                                      | 216.5                   | 243.3                 | 26.8           | 19        |
| {Fe(3-Fpy) <sub>2</sub> [Pt(CN) <sub>4</sub> ]}                                                      | 212.2                   | 239.3                 | 27.1           | 19        |
| {Fe(3-Clpy) <sub>2</sub> [Pt(CN) <sub>4</sub> ]}                                                     | 141.7                   | 161.0                 | 19.3           | 19        |
| [Fe(bipydz)(Au(CN) <sub>2</sub> ) <sub>2</sub> ] ( <b>2'</b> in the paper)                           | 273                     | 277                   | 4              | 20        |
| [Fe <sup>II</sup> (bztrz) <sub>2</sub> (Pd <sup>II</sup> (CN) <sub>4</sub> )·(H <sub>2</sub> O,EtOH) | 135                     | 154                   | 19             | 21        |
| [Fe <sup>II</sup> (bztrz) <sub>2</sub> (Pd <sup>II</sup> (CN) <sub>4</sub> )·(3H <sub>2</sub> O)     | 118; 148                | 140; 166              | 22; 18         | 21        |
| [Fe(dpb){Au(CN) <sub>2</sub> } <sub>2</sub> ]·(1.5)C <sub>6</sub> H <sub>12</sub>                    | 136                     | 142                   | 6              | 22        |
| [Fe(dpb){Au(CN) <sub>2</sub> } <sub>2</sub> ] (Desolvated Sample)                                    | 110                     | 119                   | 9              | 22        |
| [Fe(dpb){Au(CN) <sub>2</sub> } <sub>2</sub> ]·(0.9)Benzene                                           | 139; 207                | 144; 221              | 5; 14          | 22        |
| [Fe(dpb){Au(CN) <sub>2</sub> } <sub>2</sub> ]·(0.7)Naphthalene                                       | 141                     | 214                   | 73             | 22        |
| [Fe(dpb){Au(CN) <sub>2</sub> } <sub>2</sub> ]·(0.3)Anthracene                                        | 131                     | 151                   | 20             | 22        |
| [Fe(dpb){Au(CN) <sub>2</sub> } <sub>2</sub> ]·(0.4)Ferrocene                                         | 129                     | 166                   | 37             | 22        |
| [Fe(dpb){Au(CN) <sub>2</sub> } <sub>2</sub> ]·(1.4)CS <sub>2</sub>                                   | 167                     | 190                   | 23             | 22        |
| [Fe(dpoda){Ag(CN) <sub>2</sub> } <sub>2</sub> ]·(1.5)naph                                            | 181; 190;<br>228        | 187; 194;<br>232      | 5; 4; 3        | 23        |

Abbreviations: MebptH = 3-(3-methyl-2-pyridyl)-5-(2-pyridyl)-1,2,4-triazole; bpztH = 3,5-bis(pyrazin-2-yl)-1,2,4-triazole; 3-NH<sub>2</sub>py = 3-aminopyridine; bipydz = 3,6-bis(4-pyridyl)-1,2,4,5-

tetrazine; bztrz = (E)-1-phenyl-N-(1,2,4-triazol-4-yl)-methanimine; dpb = 1,4-di(pyridin-4-yl)benzene; dpoda = 2,5-di-(pyridyl)-1,3,4-oxadiazole.

### 3. References

1. J.-L. Liu, Y.-C. Chen, Y.-Z. Zheng, W.-Q. Lin, L. Ungur, W. Wernsdorfer, L. F. Chibotaru and M.-L. Tong, *Chem. Sci.*, 2013, **4**, 3310-3316.
2. G.-Z. Huang, Z.-Y. Ruan, J.-Y. Zheng, Y.-C. Chen, S.-G. Wu, J.-L. Liu and M.-L. Tong, *Sci. China: Chem.*, 2020, **63**, 1066-1074.
3. Y.-C. Chen, J.-L. Liu, L. Ungur, J. Liu, Q.-W. Li, L.-F. Wang, Z.-P. Ni, L. F. Chibotaru, X.-M. Chen and M.-L. Tong, *J. Am. Chem. Soc.*, 2016, **138**, 2829-2837.
4. S. K. Gupta, T. Rajeshkumar, G. Rajaraman and R. Murugavel, *Chem. Sci.*, 2016, **7**, 5181-5191.
5. A. B. Canaj, M. K. Singh, C. Wilson, G. Rajaraman and M. Murrie, *Chem. Commun.*, 2018, **54**, 8273-8276.
6. I. F. Díaz-Ortega, J. M. Herrera, S. Dey, H. Nojiri, G. Rajaraman and E. Colacio, *Inorg. Chem. Front.*, 2020, **7**, 689-699.
7. Y.-S. Ding, N. F. Chilton, R. E. P. Winpenny and Y.-Z. Zheng, *Angew. Chem., Int. Ed.*, 2016, **55**, 16071-16074.
8. K.-X. Yu, J. G. C. Kragoskow, Y.-S. Ding, Y.-Q. Zhai, D. Reta, N. F. Chilton and Y.-Z. Zheng, *Chem*, 2020, **6**, 1777-1793.
9. J. Liu, Y.-C. Chen, J.-L. Liu, V. Vieru, L. Ungur, J.-H. Jia, L. F. Chibotaru, Y. Lan, W. Wernsdorfer, S. Gao, X.-M. Chen and M.-L. Tong, *J. Am. Chem. Soc.*, 2016, **138**, 5441-5450.
10. Z. Jiang, L. Sun, Q. Yang, B. Yin, H. Ke, J. Han, Q. Wei, G. Xie and S. Chen, *J. Mater. Chem. C*, 2018, **6**, 4273-4280.
11. S. Bala, G.-Z. Huang, Z.-Y. Ruan, S.-G. Wu, Y. Liu, L.-F. Wang, J.-L. Liu and M.-L. Tong, *Chem. Commun.*, 2019, **55**, 9939-9942.
12. Y. Liu, Y.-C. Chen, J. Liu, W.-B. Chen, G.-Z. Huang, S.-G. Wu, J. Wang, J.-L. Liu and M.-L. Tong, *Inorg. Chem.*, 2020, **59**, 687-694.
13. F.-S. Guo, B. M. Day, Y.-C. Chen, M.-L. Tong, A. Mansikkamäki and R. A. Layfield, *Angew. Chem., Int. Ed.*, 2017, **56**, 11445-11449.
14. C. A. P. Goodwin, F. Ortu, D. Reta, N. F. Chilton and D. P. Mills, *Nature*, 2017, **548**, 439-442.
15. K. R. McClain, C. A. Gould, K. Chakarawet, S. J. Teat, T. J. Groshens, J. R. Long and B. G. Harvey, *Chem. Sci.*, 2018, **9**, 8492-8503.
16. F.-S. Guo, B. M. Day, Y.-C. Chen, M.-L. Tong, A. Mansikkamäki and R. A. Layfield, *Science*, 2018, **362**, 1400.
17. Z. Yan, J.-Y. Li, T. Liu, Z.-P. Ni, Y.-C. Chen, F.-S. Guo and M.-L. Tong, *Inorg. Chem.*, 2014, **53**, 8129-8135.
18. W. Liu, L. Wang, Y.-J. Su, Y.-C. Chen, J. Tucek, R. Zboril, Z.-P. Ni and M.-L. Tong, *Inorg. Chem.*, 2015, **54**, 8711-8716.
19. V. Martínez, A. B. Gaspar, M. C. Muñoz, G. V. Bukin, G. Levchenko and J. A. Real, *Chem. - Eur. J.*, 2009, **15**, 10960-10971.
20. J. E. Clements, J. R. Price, S. M. Neville and C. J. Kepert, *Angew. Chem., Int. Ed.*, 2014, **53**, 10164-10168.

21. M. J. Murphy, K. A. Zenere, F. Ragon, P. D. Southon, C. J. Kepert and S. M. Neville, *J. Am. Chem. Soc.*, 2017, **139**, 1330-1335.
22. J.-Y. Li, C.-T. He, Y.-C. Chen, Z.-M. Zhang, W. Liu, Z.-P. Ni and M.-L. Tong, *J. Mater. Chem. C*, 2015, **3**, 7830-7835.
23. C.-J. Zhang, K.-T. Lian, G.-Z. Huang, S. Bala, Z.-P. Ni and M.-L. Tong, *Chem. Commun.*, 2019, **55**, 11033-11036.
